# Supplementary material
Source: MDPI journal article supplement (https://www.mdpi.com/1099-4300/25/1/81)
Supplement: s1 [file s1]

# Supplementary Information-1 for ‘Compression-complexity measures for analysis and classification of coronaviruses’

December 29, 2022

## Dataset details and Phylogenetic trees

The datasets utilised in this work, and sample phylogenetic trees generated, are presented below.

Table S1: Mitochondrial genomes (mtDNA) of 41 mammals grouped into 8 species clusters

| Order          | Scientific name        | Common name               | Accession Number |
|----------------|------------------------|---------------------------|------------------|
| Perissodactyla | Rhinoceros unicornis   | Indian Rhinoceros         | X97336.1         |
|                | Ceratotherium simum    | White Rhinoceros          | Y07726.1         |
|                | Equus asinus           | Donkey                    | NC_001788.1      |
|                | Equus caballus         | Horse                     | NC_001640.1      |
| Primates       | Pongo pygmaeus         | Bornean Orangutan         | D38115.1         |
|                | Pongo abelii           | Sumatran Orangutan        | NC_002083.1      |
|                | Hylobates lar          | Lar Gibbon                | X99256.1         |
|                | Gorilla gorilla        | Gorilla                   | D38114.1         |
|                | Cercopithecus aethiops | Grivet monkey             | AY863426.1       |
|                | Macaca sylvanus        | Barbary Macaque           | NC_002764.1      |
|                | H.sapiens              | Human                     | V00662.1         |
|                | Papio hamadryas        | Baboon                    | Y18001.1         |
|                | Pan troglodytes        | Common Chimpanzee         | D38113.1         |
|                | Pan paniscus           | Pigmy Chimpanzee          | D38116.1         |
| Artiodactyla   | Bubalus bubalis        | Buffalo                   | AY488491.1       |
|                | Bos taurus             | Cow                       | V00654.1         |
|                | Capra hircus           | Goat                      | AF533441.1       |
|                | Ovis aries             | Sheep                     | AF010406.1       |
|                | Pantholops hodgsonii   | Tibetan Antelope          | NC_007441.1      |
|                | Capricornis swinhoei   | Taiwan serow              | NC_010640.1      |
|                | Sus scrofa             | Wild Boar                 | AJ002189.1       |
|                | Phacochoerus africanus | Common Warthog            | NC_008830.1      |
| Erinaceomorpha | Erinaceus europaeus    | Hedge Hog                 | X88898.2         |
| Rodentia       | Myoxus glis            | Edible dormouse           | AJ001562.1       |
|                | Sciurus vulgaris       | Red Squirrel              | AJ238588.1       |
| Carnivore      | Canis familiaris       | Dog                       | U96639.2         |
|                | Canis lupus chanco     | Himalayan Wolf            | EU442884.2       |
|                | Ailuropoda melanoleuca | Giant Panda               | EF212882.1       |
|                | Ursus arctos           | Brown Bear                | AF303110.1       |
|                | Ursus maritimus        | Polar Bear                | AF303111.1       |
|                | Ursus thibetanus       | Asian Black Bear          | DQ402478.1       |
|                | Felis catus            | Cat                       | U20753.1         |
|                | Panthera pardus        | Leopard                   | EF551002.1       |
|                | Panthera tigris        | Tiger                     | EF551003.1       |
| Cetacea        | Balaena mysticetus     | Bowhead Whale             | NC_005268.1      |
|                | Eschrichtius robustus  | Gray Whale                | NC_005270.1      |
|                | Eubalaena japonica     | North Pacific Right Whale | NC_006931.1      |
|                | Platanista minor       | Indus river Dolphin       | NC_005275.1      |
|                | Balaenoptera musculus  | Blue Whale                | X72204.1         |
|                | Balaenoptera physalus  | Fin Whale                 | NC_001321.1      |
| Lagomorpha     | Oryctolagus cuniculus  | European Rabbit           | AJ001588.1       |

Table S2: Genome sequence details of SARS-CoV-1 and Non-SARS-CoV-1 coronaviruses belonging to Groups I, II and III

| Virus type               | Genome                                            | Abbreviation | Accession Number |
|--------------------------|---------------------------------------------------|--------------|------------------|
| SARS CoV-1 Coronaviruses | SARS corona virus SIN2500                         | SIN2500      | AY283794         |
|                          | SARS corona virus SIN677                          | SIN2677      | AY283795         |
|                          | SARS corona virus SIN2679                         | SIN2679      | AY283796         |
|                          | SARS corona virus SIN2748                         | SIN2748      | AY283797         |
|                          | SARS corona virus SIN2774                         | SIN2774      | AY283798         |
|                          | SARS corona virus BJ01                            | BJ01         | AY278488         |
|                          | SARS corona virus BJ02                            | BJ02         | AY278487         |
|                          | SARS corona virus BJ03                            | BJ03         | AY278490         |
|                          | SARS corona virus BJ04                            | BJ04         | AY279354         |
|                          | SARS corona virus HKU-39849                       | HKU-39849    | AY278491         |
|                          | SARS corona virus TOR2                            | TOR2         | AY274119         |
|                          | SARS corona virus Urbani                          | Urbani       | AY278741         |
|                          | SARS corona virus CUHK-W1                         | CUHKU-W1     | AY278554         |
|                          | SARS corona virus CUHK-Su10                       | CUHKU-Su10   | AY282752         |
|                          | SARS corona virus GD01                            | GD01         | AY278489         |
| Group I coronavirus      | Human corona virus 229E                           | HCoV-229E    | KF514433         |
|                          | Human corona virus NL63                           | HCoV-NL63    | KF530114         |
|                          | Transmissible Gastroenteritis virus, Purdue       | TGEV         | DQ811789         |
|                          | Transmissible Gastroenteritis virus, strain WH-1  | TGEV WH-1    | HQ462571         |
|                          | Porcine epidemic Diarrhea virus                   | PEDV         | NC_003436        |
|                          | Feline Corona Virus DF-2                          | FCoV DF-2    | DQ286389         |
| Group II coronaviruses   | Murine hepatitis virus                            | JHM MHV-JHM  | AC_000192        |
|                          | Murine hepatitis virus Strain Penn 97-1           | MHVP         | AF208066         |
|                          | Murine hepatitis virus Strain ML-10               | MHVM         | AF208067         |
|                          | Bovine Corona Virus                               | BCoV         | NC_003045        |
|                          | Bovine Corona Virus Isolate BCoV-LUN              | BCoVL        | AF391542         |
|                          | Porcine hemagglutinating encephalomyelitis,       | PHEV         | NC_007732        |
|                          | Porcine hemagglutinating encephalomyelitis, VW572 | PHEV -VW572  | DQ011855         |
| Group III coronaviruses  | Avian infectious bronchitis virus                 | IBV          | NC_001451        |
|                          | Turkey Corona Virus                               | TCV          | NC_010800        |

Table S3: Genome sequence details of 30 COVID-19 causing coronavirus sequences and 30 coronavirus sequences not causing COVID-19 (consisting of alpha, beta, gamma and deltacoronaviruses)

| Virus type            | Genome                                                                        | Abbreviation | Accession Number |
|-----------------------|-------------------------------------------------------------------------------|--------------|------------------|
| SARS-CoV-2 (COVID-19) | hCoV-19/Kuwait/KU09/2020                                                      | hCoV19 1     | EPI_ISL_416541   |
|                       | hCoV-19/South Africa/KRISP-011/2020                                           | hCoV19 2     | EPI_ISL_421575   |
|                       | hCoV-19/New Zealand/20CV0181/2020                                             | hCoV19 3     | EPI_ISL_548049   |
|                       | hCoV-19/New Zealand/20CV0636/2020                                             | hCoV19 4     | EPI_ISL_707800   |
|                       | hCoV-19/Uruguay/CEL-M116/2020                                                 | hCoV19 5     | EPI_ISL_750177   |
|                       | hCoV-19/Egypt/CHE57357-P-01/2020                                              | hCoV19 6     | EPI_ISL_812850   |
|                       | hCoV-19/French Guiana/IPP00588/2021                                           | hCoV19 7     | EPI_ISL_890352   |
|                       | hCoV-19/Afghanistan/IMB07966/2020                                             | hCoV19 8     | EPI_ISL_1001002  |
|                       | hCoV-19/Morocco/FMP-82/2021                                                   | hCoV19 9     | EPI_ISL_1159698  |
|                       | hCoV-19/Ethiopia/39379/2020                                                   | hCoV19 10    | EPI_ISL_1170957  |
|                       | hCoV-19/Hong Kong/HKU-210308-L34/2020                                         | hCoV19 11    | EPI_ISL_1197103  |
|                       | hCoV-19/Guam/GU-CDC-2-3906191/2020                                            | hCoV19 12    | EPI_ISL_1273054  |
|                       | hCoV-19/Bangladesh/BSMMU-11/2020                                              | hCoV19 13    | EPI_ISL_1299202  |
|                       | hCoV-19/Romania/Bucuresti430063/2021                                          | hCoV19 14    | EPI_ISL_1381311  |
|                       | hCoV-19/Argentina/PAIS-D0091/2021                                             | hCoV19 15    | EPI_ISL_1396360  |
|                       | hCoV-19/Australia/QLD1760/2021                                                | hCoV19 16    | EPI_ISL_1396521  |
|                       | hCoV-19/Papua New Guinea/PNG544/2021                                          | hCoV19 17    | EPI_ISL_1424873  |
|                       | hCoV-19/Uganda/UG337/2020                                                     | hCoV19 18    | EPI_ISL_1469406  |
|                       | hCoV-19/Russia/SPE-RIL-MH14658S/2021                                          | hCoV19 19    | EPI_ISL_1491705  |
|                       | hCoV-19/Finland/13DS7CG11/2020                                                | hCoV19 20    | EPI_ISL_1595812  |
|                       | hCoV-19/Peru/ARE-UPCH-0391/2021                                               | hCoV19 21    | EPI_ISL_1629781  |
|                       | hCoV-19/Madagascar/IPM-40288/2020                                             | hCoV19 22    | EPI_ISL_1660331  |
|                       | hCoV-19/India/MH-ICMR-NIV-INSACOG-GSEQ-1129/2021                              | hCoV19 23    | EPI_ISL_1704606  |
|                       | hCoV-19/Chile/AP-78245/2021                                                   | hCoV19 24    | EPI_ISL_1712369  |
|                       | hCoV-19/Australia/QLD1850/2021                                                | hCoV19 25    | EPI_ISL_1754857  |
|                       | hCoV-19/Switzerland/SH-ETHZ-530661/2020                                       | hCoV19 26    | EPI_ISL_1760974  |
|                       | hCoV-19/India/CH-ICMR-991/2020                                                | hCoV19 27    | EPI_ISL_1761617  |
|                       | hCoV-19/Italy/ABR-IZSGC-228180/2021                                           | hCoV19 28    | EPI_ISL_1785135  |
|                       | hCoV-19/Germany/SL-SU-10451049/2020                                           | hCoV19 29    | EPI_ISL_1786492  |
|                       | hCoV-19/Brazil/SP-Hemocentro-FMRP-New15/2021                                  | hCoV19 30    | EPI_ISL_1786561  |
| Alphacoronavirus      | Swine acute diarrhea syndrome coronavirus isolate SADS-CoV/GDWT-P7            | Alpha CoV 1  | MK994934         |
|                       | Swine acute diarrhea syndrome coronavirus strain GDLX/2019                    | Alpha CoV 2  | MK651076         |
|                       | Porcine epidemic diarrhea virus strain COL/Antioquia09831/2015                | Alpha CoV 3  | MK071636         |
|                       | Porcine epidemic diarrhea virus strain COL/Antioquia00265/2015                | Alpha CoV 4  | MK071619         |
|                       | Swine acute diarrhea syndrome coronavirus isolate 211                         | Alpha CoV 5  | MF769421         |
|                       | Porcine epidemic diarrhea virus isolate GER/L03210/2019                       | Alpha CoV 6  | LR812931         |
|                       | Ferret coronavirus isolate FRCoV-NL-2010                                      | Alpha CoV 7  | KM347965         |
| Betacoronavirus       | Murine hepatitis virus strain A59 isolate WT-MHV P250                         | Beta CoV 1   | MF618252         |
|                       | BtVs-BetaCoV/SC2013                                                           | Beta CoV 2   | KJ473821         |
|                       | Betacoronavirus Erinaceus/VMC/DEU/2012 isolate ErinaceusCoV/2012-174/GER/2012 | Beta CoV 3   | KC545383         |
|                       | Murine coronavirus strain JHM.WU                                              | Beta CoV 4   | JX169867         |
|                       | Murine hepatitis virus strain S/3239-17, complete genome.                     | Beta CoV 5   | JQ173883         |
|                       | Rat coronavirus isolate 681                                                   | Beta CoV 6   | JF792616         |
|                       | Murine hepatitis virus strain S                                               | Beta CoV 7   | GU593319         |
|                       | Murine coronavirus RA59/R13                                                   | Beta CoV 8   | FJ647218         |
|                       | Murine hepatitis virus strain A59                                             | Beta CoV 9   | AY700211         |
|                       | Murine hepatitis virus strain JHM                                             | Beta CoV 10  | AC_000192        |
| Gammacoronavirus      | Infectious bronchitis virus strain cK/CH/LDL/091021                           | Gamma CoV 1  | MN509587         |
|                       | Infectious bronchitis virus isolate ArkGA <sub>p</sub> 60                     | Gamma CoV 2  | MH779859         |
|                       | Infectious bronchitis virus isolate IBV <sub>S</sub> ES <sub>1</sub> 5AB – 01 | Gamma CoV 3  | MH539771         |
|                       | Infectious bronchitis virus isolate IBS037A/2014                              | Gamma CoV 4  | MG738154         |
|                       | Avian coronavirus strain L1148                                                | Gamma CoV 5  | KY933090         |
|                       | Bottlenose dolphin coronavirus HKU22 isolate CF090331                         | Gamma CoV 6  | KF793826         |
| Deltacoronavirus      | Porcine coronavirus HKU15 strain OH11846                                      | Delta CoV 1  | KT381613         |
|                       | Porcine deltacoronavirus strain USA/Minnesota/2013                            | Delta CoV 2  | KR265853         |
|                       | Porcine deltacoronavirus isolate CHN-AH-2004                                  | Delta CoV 3  | KP757890         |
|                       | Porcine coronavirus HKU15 strain PA3148                                       | Delta CoV 4  | KJ584358         |
|                       | Porcine deltacoronavirus 8734/USA-IA/2014                                     | Delta CoV 5  | KJ567050         |
|                       | Porcine coronavirus HKU15 strain HKU15-155                                    | Delta CoV 6  | JQ065043         |
|                       | Bulbul coronavirus HKU11-934                                                  | Delta CoV 7  | FJ376619         |

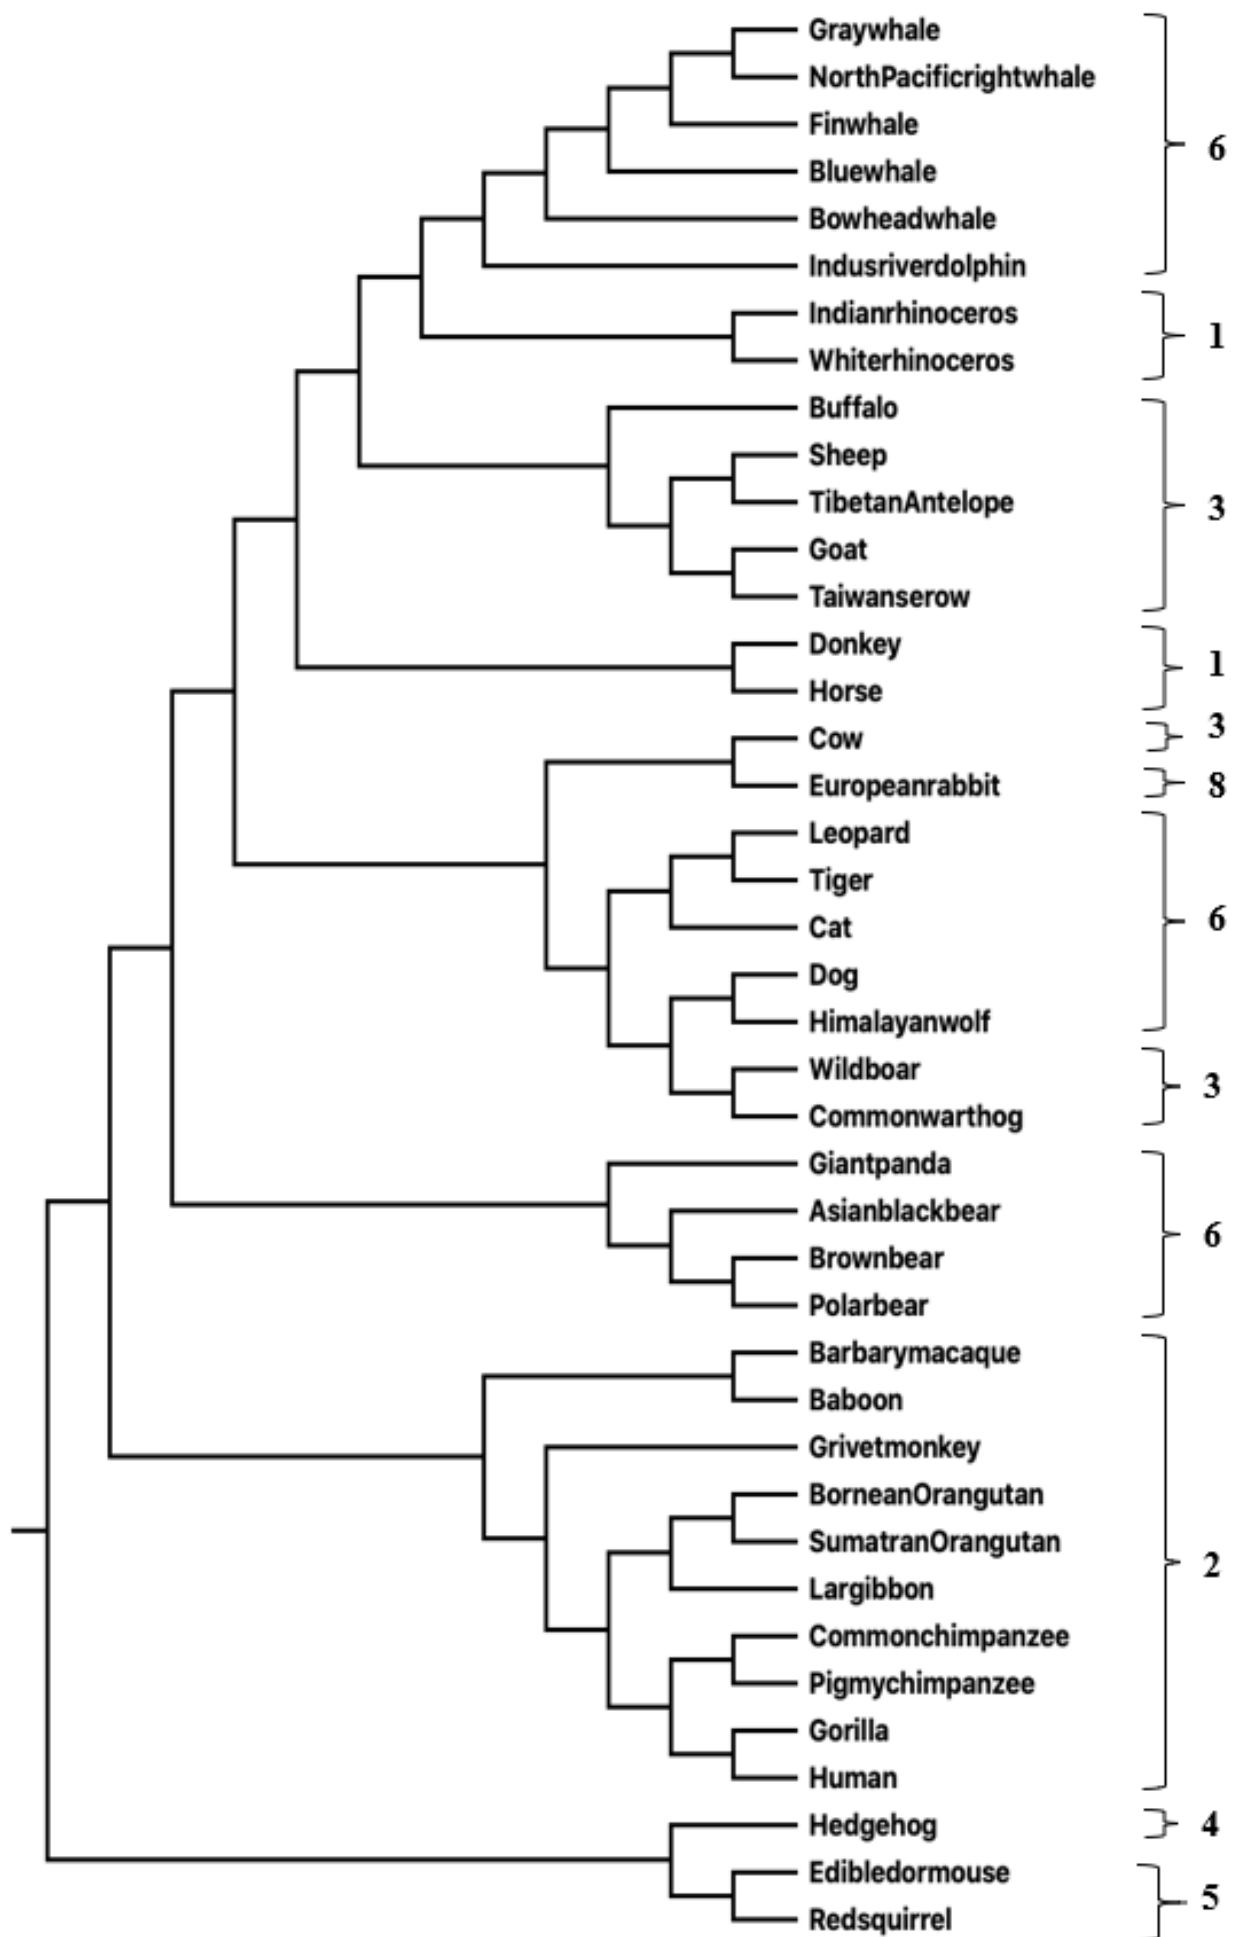

Figure S1: Phylogenetic tree for mammals generated using LZC based distance measure

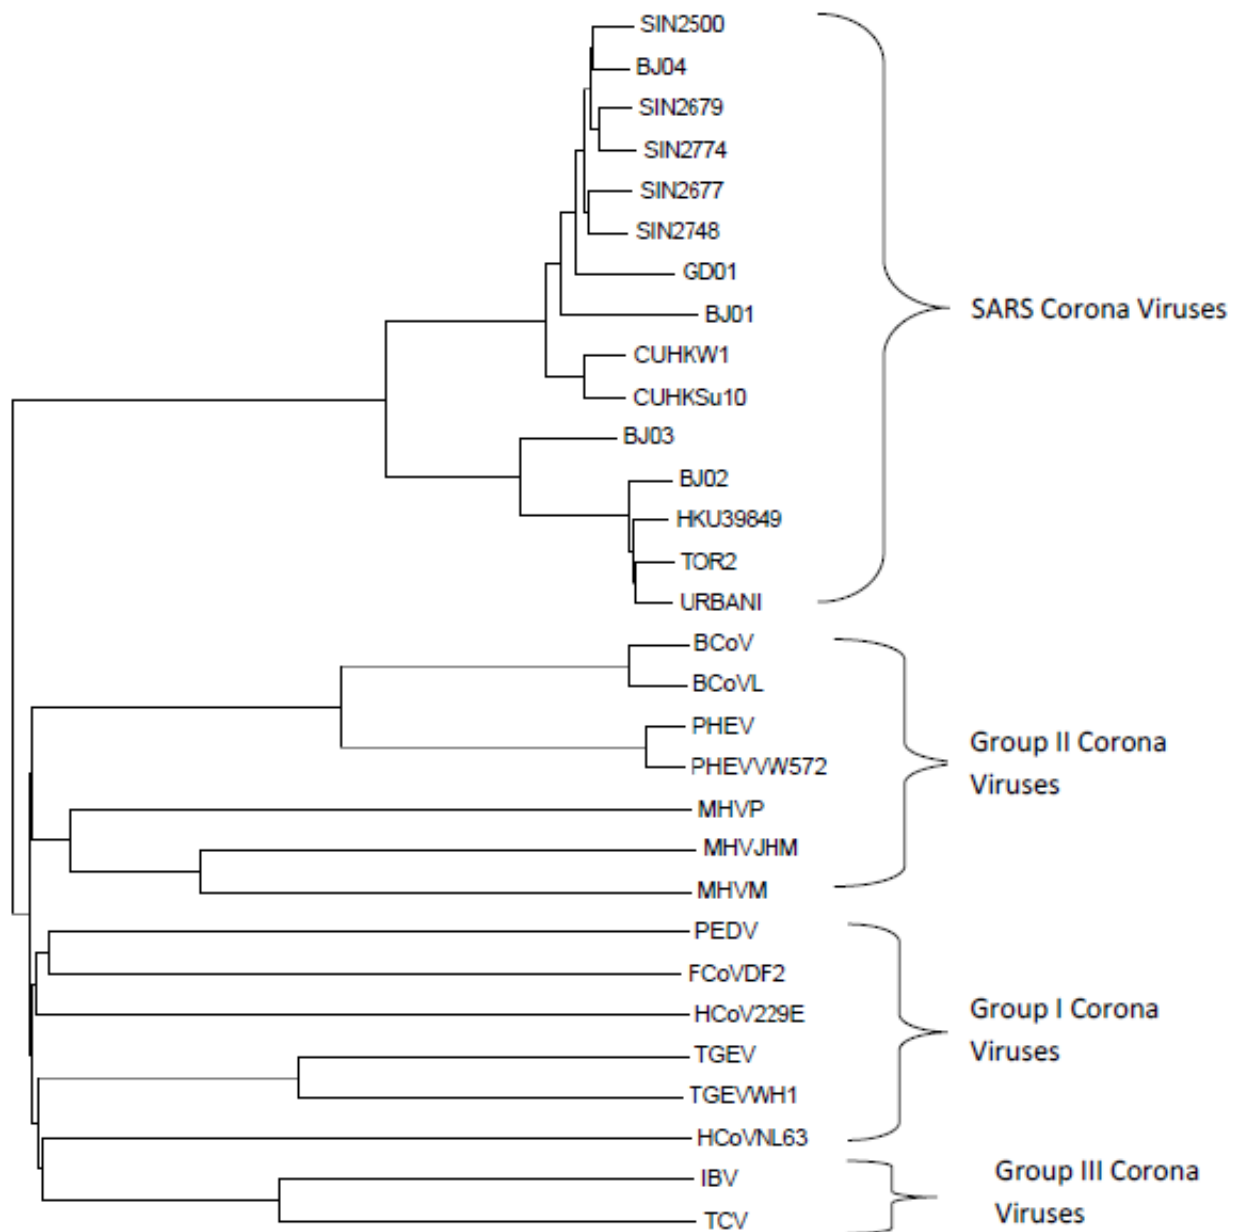

Figure S2: Phylogenetic tree generated for coronaviruses (SARS-CoV-1 and non-SARS-CoV-1) with LZC based distance measure.

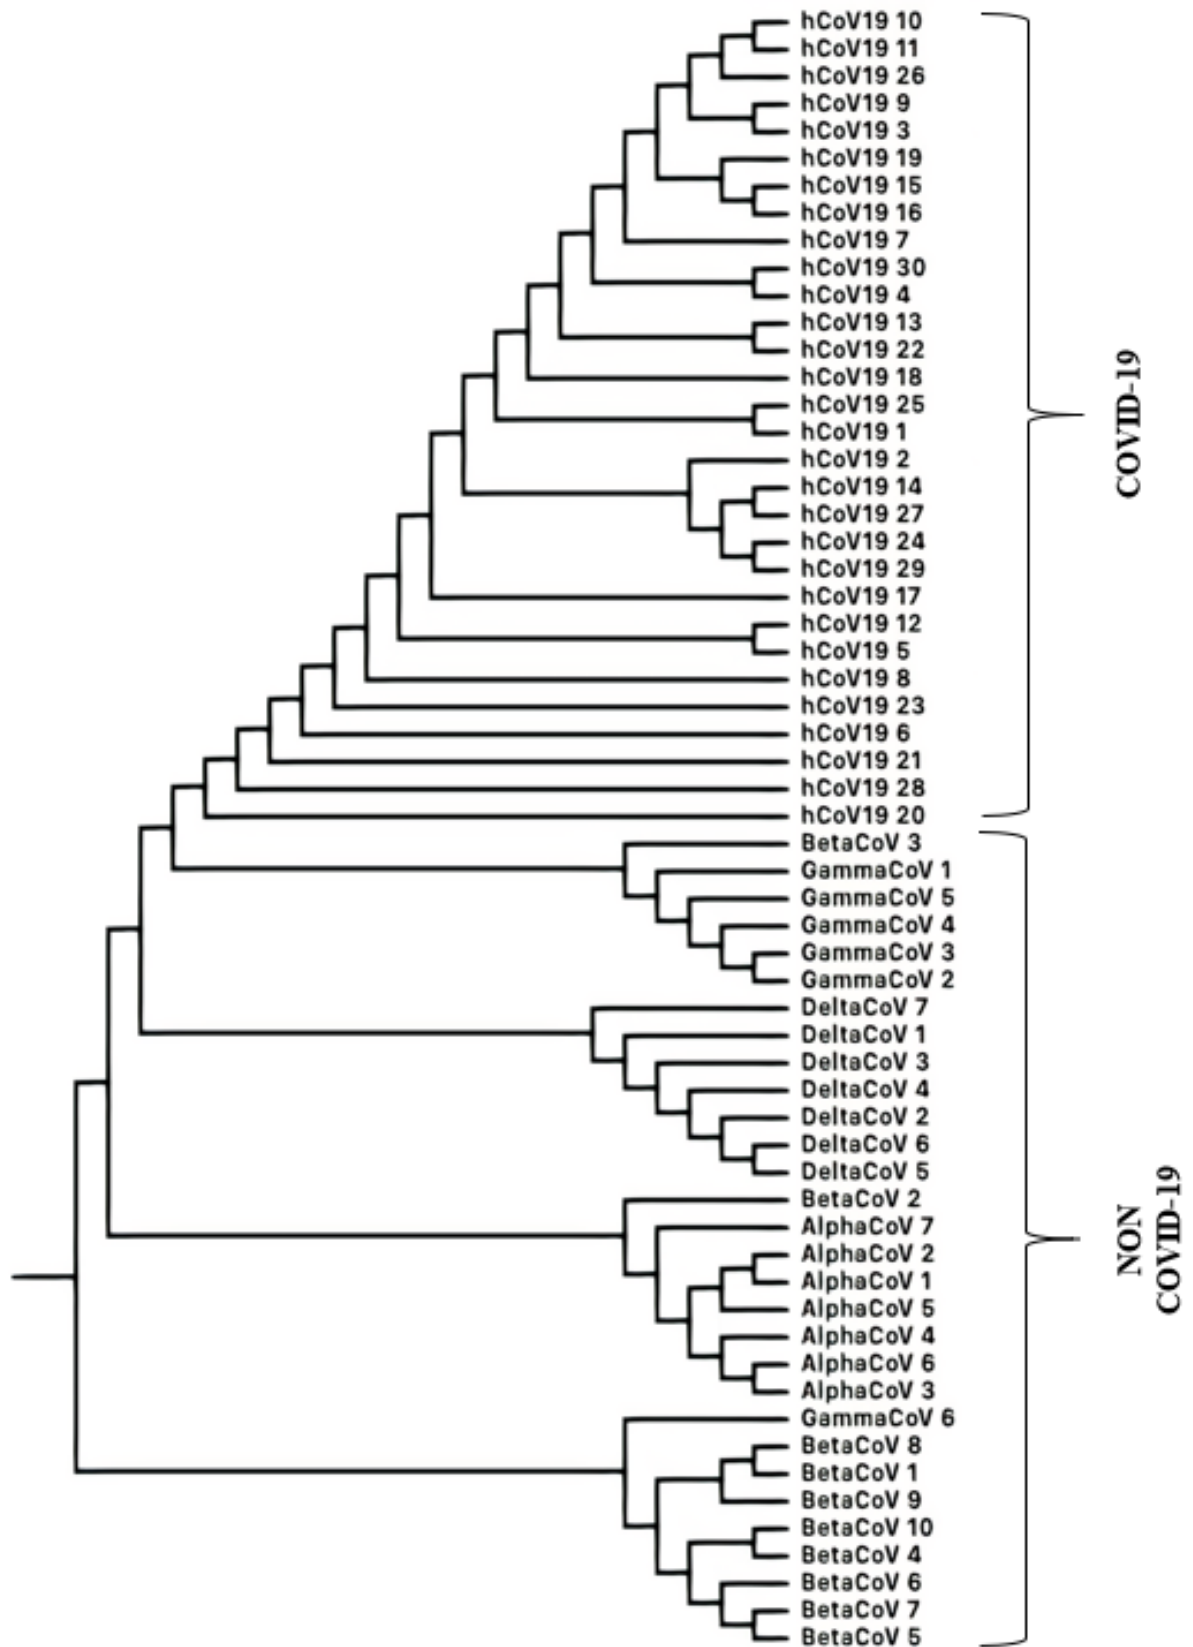

Figure S3: Phylogenetic tree generated for coronaviruses causing COVID-19 and those not causing COVID-19 using LZC based distance measure.

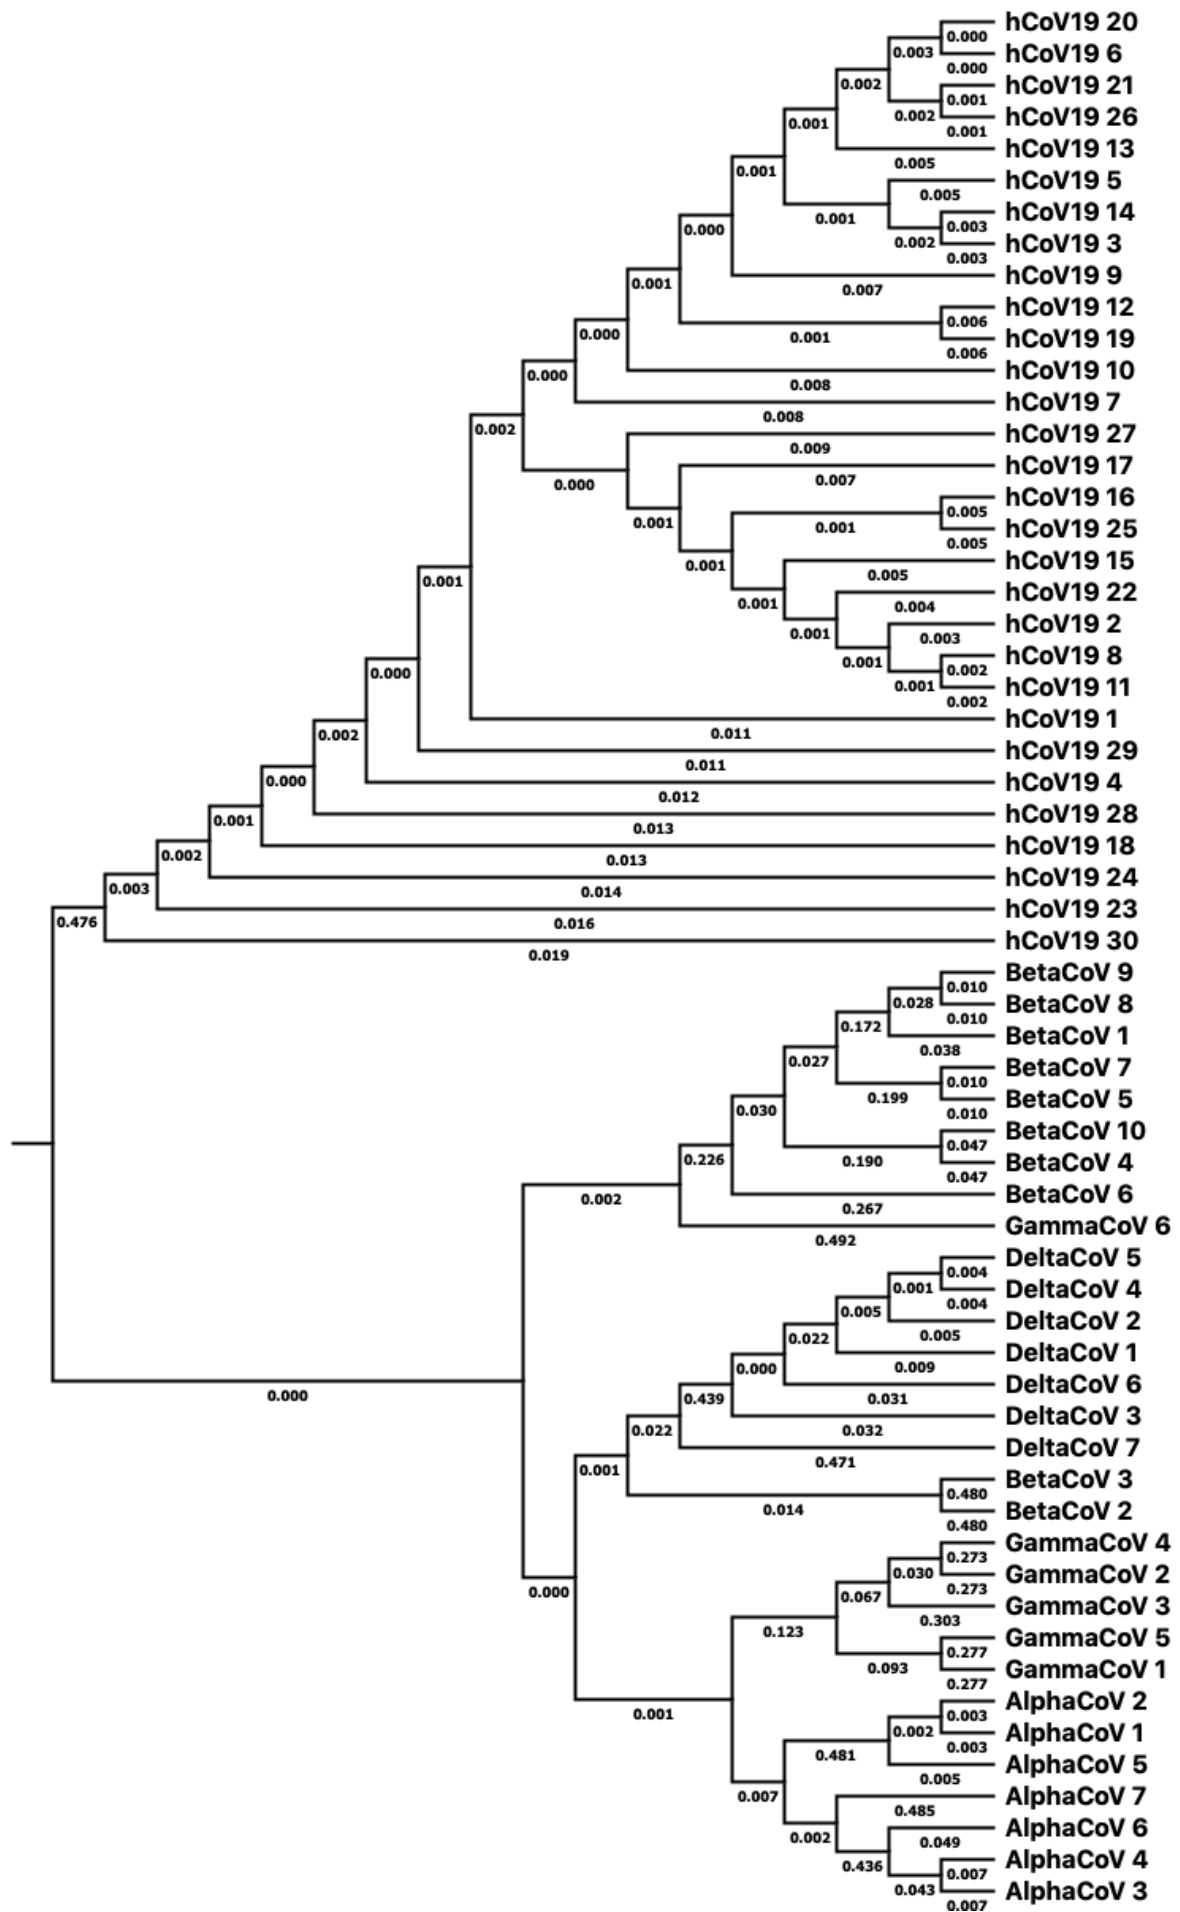

Figure S4: Phylogenetic tree generated for coronaviruses causing COVID-19 and those not causing COVID-19 using ETC based distance measure, with distances displayed.

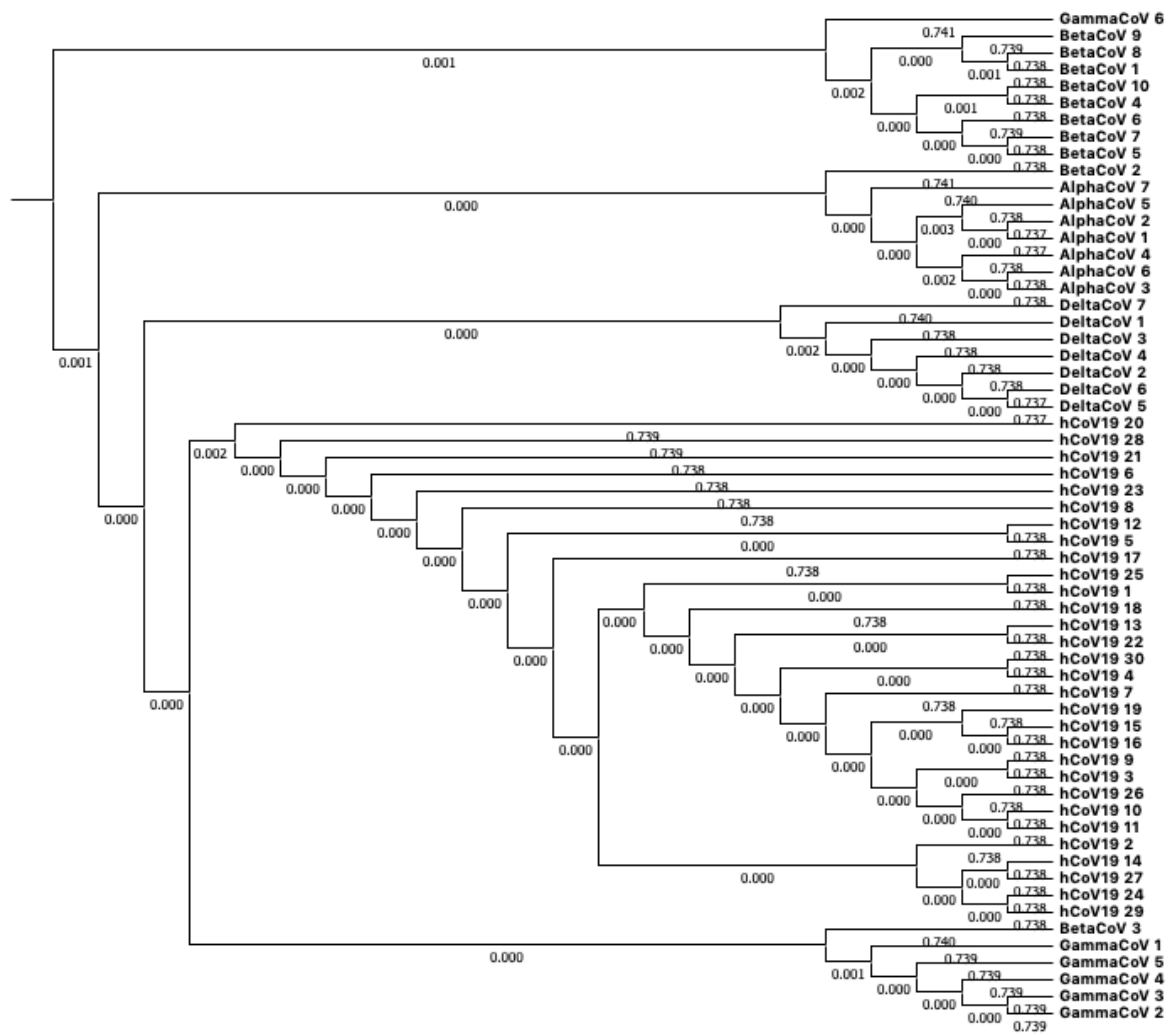

Figure S5: Phylogenetic tree generated for coronaviruses causing COVID-19 and those not causing COVID-19 using LZC based distance measure, with distances displayed.
